# Supplementary material for: A Supplement with Bromelain, Lentinula edodes, and Quercetin: Antioxidant Capacity and Effects on Morphofunctional and Fecal Parameters (Calprotectin, Cortisol, and Intestinal Fermentation Products) in Kennel Dogs
Source: MDPI journal article supplement (doi:10.3390/vetsci10080486), 2023-07-27
Supplement: s1 [file s1]

## Supplementary Materials

**Table S1.** Linear Mixed Models output summary: Effects of Treatment, Time and Treatment\*Time interaction on fecal parameters.

|                         | Calprotectin<br>in<br>Model | Cortisol<br>Model | Short Fatty<br>Chain Acids<br>Model | Indole/Scatole<br>Model | N-methylhistamine<br>Model | pH Model          |
|-------------------------|-----------------------------|-------------------|-------------------------------------|-------------------------|----------------------------|-------------------|
| (Intercept)             | 5.78***<br>(0.28)           | 0.63***<br>(0.02) | 199.28***<br>(5.14)                 | 1.73***<br>(0.08)       | 109.07***<br>(3.25)        | 6.48***<br>(0.06) |
| Treat                   | -0.46<br>(0.38)             | -0.06*<br>(0.02)  | 22.13***<br>(6.31)                  | -0.27**<br>(0.09)       | -7.65<br>(4.10)            | 0.02<br>(0.08)    |
| Time                    | -0.00<br>(0.05)             | 0.00<br>(0.00)    | -0.22<br>(1.41)                     | 0.01<br>(0.02)          | 0.47<br>(0.82)             | 0.01<br>(0.01)    |
| Treat:Time              | -0.22***<br>(0.06)          | -0.02**<br>(0.01) | 4.85**<br>(1.52)                    | -0.06**<br>(0.02)       | -3.57***<br>(0.90)         | -0.01<br>(0.01)   |
| AIC                     | 375.28                      | -341.30           | 1299.76                             | 71.37                   | 1155.15                    | -114.45           |
| BIC                     | 393.34                      | -323.23           | 1317.83                             | 89.44                   | 1173.22                    | -96.38            |
| Log Likelihood          | -181.64                     | 176.65            | -643.88                             | -29.69                  | -571.58                    | 63.22             |
| Num. obs.               | 150                         | 150               | 150                                 | 150                     | 150                        | 150               |
| Num. groups:<br>Dog     | 30                          | 30                | 30                                  | 30                      | 30                         | 30                |
| Var: Dog<br>(Intercept) | 0.74                        | 0.00              | 70.64                               | 0.01                    | 46.71                      | 0.04              |
| Var: Residual           | 0.39                        | 0.00              | 296.49                              | 0.07                    | 101.92                     | 0.01              |

\*\*\*p < 0.001; \*\*p < 0.01; \*p < 0.05. Model Formula: Treatment + Time + Treatment \* Time + (1|Dog).

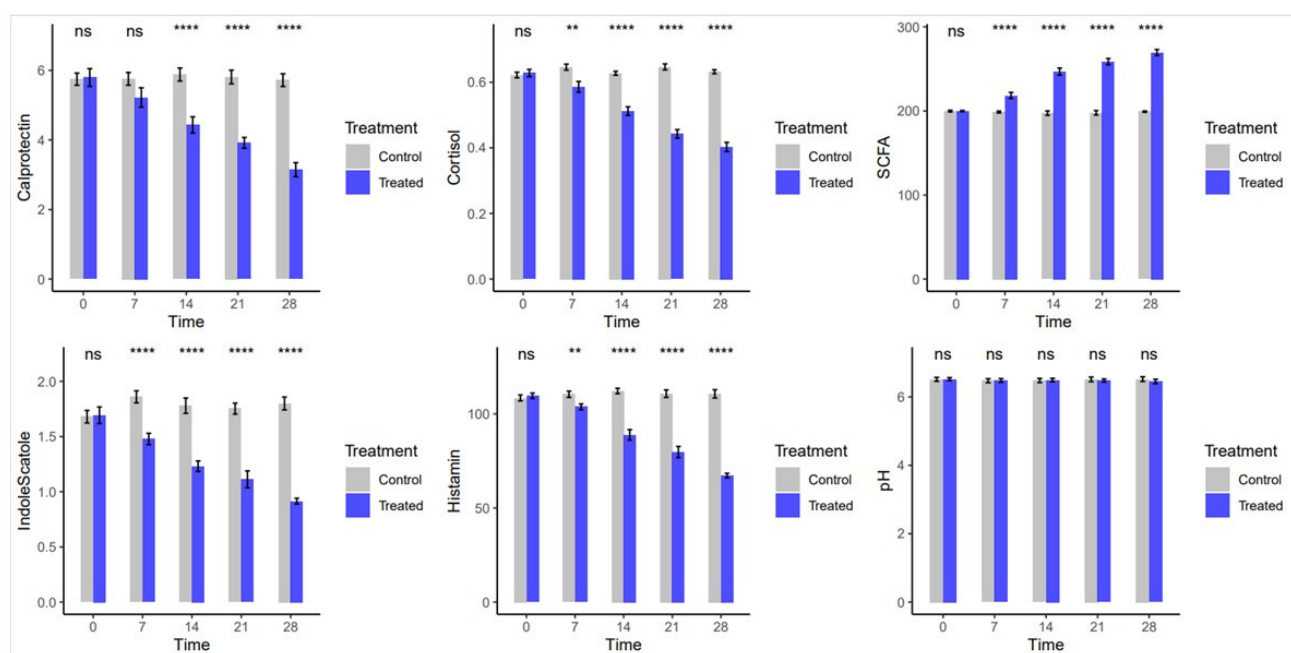

**Figure S1.** Bar charts comparative analysis (t-test) between treated (TRT) group and control (CTR) group at different time points. \*\*\* $p < 0.001$ ; \*\* $p < 0.01$ ; \* $p < 0.05$ .

**Table S2.** Analytical chemical composition of feed products containing bromelain, *Lentinula edodes* and the mixture.

| Substances                   | Proteins (%) | Fats (%) | Ash (%) | Fiber (%) |
|------------------------------|--------------|----------|---------|-----------|
| Bromelain (B)                | 2.13         | 0.10     | 8.42    | 3.42      |
| Quercetin (Q)                | 0.3          | 45.86    | 5.89    | 0.5       |
| <i>Lentinula edodes</i> (LE) | 18.0         | 0.5      | 1.3     | 5.2       |
| Mix (B+Q+LE)                 | 9            | 4.6      | 5.4     | 3.5       |
